# Supplementary material for: Embargo on Lion Hunting Trophies from West Africa: An Effective Measure or a Threat to Lion Conservation?
Source: PLoS One. 2016 May 16;11(5):e0155763. doi: 10.1371/journal.pone.0155763 (PMC4868358; doi:10.1371/journal.pone.0155763)
Supplement: S2 Table — (XLSX) [file pone.0155763.s002.xlsx]

## Sheet: Feuil1
Bouché & al. Embargo on lion hunting trophies from West Africa
PLOS one
S2. 2014 Lion survey results in the hunting areas of the WAP
Country	Hunting areas	Area (km2)	Density	Number
			(N/100 km2)
Burkina Faso	Tapoa-Djerma	242	1.78	4
Burkina Faso	Kourtiagou	485.26	1e-05	0
Burkina Faso	Pama Nord	825.54	1e-05	0
Burkina Faso	Pama Centre Nord	839.2	0.51	4.30928
Burkina Faso	Pama Centre Sud	525.34	0.82	4.30928
Burkina Faso	Pama Sud	601	2.87	17.2371
Burkina Faso	Konkombouri	700	7.18	51.7113
Burkina Faso	Ouamou-Ougarou	654.73	0.68	4
Burkina Faso	Singou	708	1.25	9
Burkina Faso	Pagou-Tandougou	404.21	10.66	43
Burkina Faso	Koakrana	265.49	8.12	22
Benin	Porga	765.7	0	0
Benin	Batia	746.8	1.15	9
Benin	Konkombri	259	0	0
Benin	Mékrou	1064	0	0
Benin	Djona	1186	1.82	22
Total		10272.3	1.85	190
